# Supplementary material for: Repeatability of Health and Welfare Traits and Correlation with Performance Traits in Dairy Goats Reared under Low-Input Farming Systems
Source: MDPI journal article supplement (doi:10.3390/vetsci9060289), 2022-06-11
Supplement: s1 [file s1]

**Repeatability of health and welfare traits and correlation with performance traits in dairy goats reared under low-input farming systems**

Sotiria Vouraki, Athanasios I. Gelasakis, Vasileia Fotiadou, Georgios Banos, Georgios Arsenos

**Supplement 1**

**Table S1.** Repeatability estimates (standard error in parentheses) for performance traits in Eghoria, Skopelos and Damascus goats; all estimates were statistically greater than zero ( $P < 0.05$ ).

| <b>Trait</b>          | <b>Eghoria</b> | <b>Skopelos</b> | <b>Damascus</b> |
|-----------------------|----------------|-----------------|-----------------|
| Milk yield (g, ln)    | 0.35 (0.02)    | 0.47 (0.02)     | 0.21 (0.02)     |
| Fat yield (g, ln)     | 0.26 (0.02)    | 0.35 (0.02)     | 0.20 (0.02)     |
| Protein yield (g, ln) | 0.34 (0.02)    | 0.41 (0.02)     | 0.23 (0.02)     |
| Lactose yield (g, ln) | 0.34 (0.02)    | 0.46 (0.02)     | 0.20 (0.02)     |
| SNF yield (g, ln)     | 0.35 (0.02)    | 0.44 (0.02)     | 0.21 (0.02)     |
| BCS (1-5)             | 0.41 (0.02)    | 0.37 (0.02)     | 0.52 (0.02)     |

SNF=solids-non-fat; BCS=body condition score (1=emaciated, 5=obese).

**Table S2.** Animal correlations (standard error in parentheses) of health and welfare traits with performance traits in Eghoria goats.

| Health and welfare traits      | Performance traits    |                      |                          |                          |                      |              |
|--------------------------------|-----------------------|----------------------|--------------------------|--------------------------|----------------------|--------------|
|                                | Milk yield<br>(g, ln) | Fat yield<br>(g, ln) | Protein yield<br>(g, ln) | Lactose yield<br>(g, ln) | SNF yield<br>(g, ln) | BCS<br>(1-5) |
| SCC ( $\times 10^3$ cells/ml)  | -0.15 (0.06)*         | -0.22 (0.06)*        | -0.08 (0.07)             | -0.20 (0.06)*            | -0.15 (0.07)*        | 0.08 (0.06)  |
| TVC ( $\times 10^3$ cfu/ml)    | -0.14 (0.07)*         | -0.20 (0.07)*        | -0.03 (0.07)             | -0.19 (0.07)*            | -0.12 (0.07)*        | 0.12 (0.07)  |
| SMI                            | -0.21 (0.07)*         | -0.26 (0.08)*        | -0.11 (0.07)             | -0.26 (0.07)*            | -0.19 (0.07)*        | 0.12 (0.07)  |
| UHP1 (0-1)                     | -0.21 (0.07)*         | -0.26 (0.08)*        | -0.08 (0.07)             | -0.28 (0.07)*            | -0.20 (0.07)*        | 0.07 (0.07)  |
| UHP2 (0-2)                     | -0.22 (0.08)          | -0.31 (0.09)         | -0.09 (0.08)             | -0.30 (0.08)             | -0.21 (0.09)         | 0.12 (0.08)  |
| UHP3 (0-3)                     | -0.18 (0.07)          | -0.27 (0.07)         | -0.09 (0.07)             | -0.25 (0.07)             | -0.18 (0.07)         | 0.08 (0.07)  |
| GIN FEC (eggs/g, Tukey)        | -0.34 (0.19)          | -0.34 (0.20)         | -0.22 (0.21)             | -0.34 (0.20)             | -0.29 (0.20)         | -0.25 (0.16) |
| Cestode FEC (eggs/g, Tukey)    | -0.06 (0.21)          | -0.06 (0.23)         | 0.02 (0.23)              | -0.09 (0.24)             | -0.04 (0.22)         | 0.11 (0.18)  |
| Lungworm FLC (larvae/g, Tukey) | 0.00 (0.29)           | 0.20 (0.29)          | 0.09 (0.31)              | -0.07 (0.30)             | 0.00 (0.30)          | 0.09 (0.25)  |
| GIN infection (0-1)            | -0.39 (0.17)*         | -0.30 (0.17)         | -0.29 (0.18)             | -0.39 (0.18)*            | -0.37 (0.17)*        | -0.13 (0.16) |
| Cestode infection (0-1)        | -0.05 (0.39)          | -0.10 (0.38)         | 0.07 (0.39)              | -0.12 (0.37)             | -0.01 (0.39)         | 0.22 (0.32)  |
| Lungworm infection (0-1)       | -0.02 (0.24)          | 0.10 (0.26)          | 0.05 (0.25)              | -0.10 (0.24)             | -0.02 (0.24)         | 0.04 (0.20)  |
| Endoparasite infection (0-1)   | -0.39 (0.17)*         | -0.27 (0.18)         | -0.27 (0.18)             | -0.39 (0.17)*            | -0.36 (0.18)*        | -0.11 (0.16) |
| Tick infestation (0-1)         | 0.22 (0.22)           | -0.02 (0.24)         | 0.11 (0.24)              | 0.16 (0.23)              | 0.16 (0.23)          | 0.15 (0.23)  |
| Myiasis (0-1)                  | NE                    | NE                   | NE                       | NE                       | NE                   | NE           |
| Ear injuries (0-1)             | -0.02 (0.09)          | 0.02 (0.10)          | 0.01 (0.09)              | -0.01 (0.09)             | -0.02 (0.09)         | -0.14 (0.08) |
| Horn injuries (0-1)            | -0.08 (0.09)          | 0.01 (0.09)          | -0.10 (0.09)             | -0.11 (0.09)             | -0.09 (0.09)         | -0.07 (0.08) |
| Head skin lesions (0-1)        | -0.21 (0.12)          | -0.25 (0.13)         | -0.28 (0.12)*            | -0.20 (0.12)             | 0.25 (0.13)          | -0.21 (0.12) |
| Nasal discharge (0-1)          | 0.16 (0.10)           | 0.16 (0.10)          | 0.09 (0.10)              | 0.11 (0.10)              | 0.12 (0.11)          | 0.19 (0.10)  |
| Ocular discharge (0-1)         | NE                    | NE                   | NE                       | NE                       | NE                   | NE           |
| Head problems (0-1)            | -0.06 (0.06)          | -0.01 (0.08)         | -0.05 (0.07)             | -0.07 (0.07)             | -0.06 (0.07)         | -0.16 (0.09) |
| Abscess (0-1)                  | -0.19 (0.13)          | -0.29 (0.16)         | -0.19 (0.13)             | -0.17 (0.13)             | -0.19 (0.12)         | -0.14 (0.12) |
| Diarrhoea (0-1)                | NE                    | NE                   | NE                       | NE                       | NE                   | NE           |

|                          |              |               |              |              |              |              |
|--------------------------|--------------|---------------|--------------|--------------|--------------|--------------|
| Injury (0-1)             | NE           | NE            | NE           | NE           | NE           | NE           |
| Hernia (0-1)             | NE           | NE            | NE           | NE           | NE           | NE           |
| Body problems (0-1)      | -0.20 (0.13) | -0.23 (0.12)  | -0.25 (0.12) | -0.21 (0.12) | -0.22 (0.12) | -0.18 (0.12) |
| Lameness (0-1)           | NE           | NE            | NE           | NE           | NE           | NE           |
| Overgrown claws (0-1)    | 0.16 (0.15)  | 0.15 (0.15)   | 0.15 (0.15)  | 0.13 (0.14)  | 0.16 (0.15)  | -0.06 (0.14) |
| Arthritis (0-1)          | NE           | NE            | NE           | NE           | NE           | NE           |
| Leg problems (0-1)       | 0.17 (0.14)  | 0.19 (0.15)   | 0.15 (0.15)  | 0.16 (0.14)  | 0.18 (0.14)  | -0.12 (0.14) |
| Udder asymmetry (0-1)    | -0.10 (0.07) | -0.12 (0.07)  | -0.05 (0.07) | -0.08 (0.07) | -0.07 (0.07) | 0.14 (0.08)  |
| Udder abscess (0-1)      | 0.11 (0.07)  | -0.04 (0.08)  | 0.17 (0.07)* | 0.10 (0.07)  | 0.13 (0.07)  | -0.04 (0.07) |
| Udder skin lesions (0-1) | 0.00 (0.13)  | -0.14 (0.14)  | 0.06 (0.13)  | -0.02 (0.14) | -0.00 (0.13) | 0.09 (0.13)  |
| Udder problems (0-1)     | -0.00 (0.08) | -0.08 (0.08)  | 0.07 (0.08)  | -0.00 (0.07) | 0.04 (0.08)  | 0.11 (0.07)  |
| Skin lesions (0-1)       | -0.19 (0.12) | -0.27 (0.13)* | -0.23 (0.12) | -0.18 (0.12) | -0.23 (0.12) | -0.13 (0.12) |
| Injuries (0-1)           | -0.06 (0.07) | 0.00 (0.08)   | -0.05 (0.07) | -0.07 (0.07) | -0.07 (0.07) | -0.13 (0.07) |

SNF=solids-non-fat; BCS=body condition score (1=emaciated, 5=obese); SCC=somatic cell count; TVC=total viable count; SMI=subclinical mastitis index; UHP1= scored as 0 if somatic cell count  $\leq 10^6$  cells/ml and/or total viable count  $\leq 2 \times 10^4$  cfu/ml, or 1 if somatic cell count  $> 10^6$  cells/ml and total viable count  $> 20 \times 10^3$  cfu/ml; UHP2= scored as 0 if somatic cell count  $\leq 10^6$  cells/ml and total viable count  $\leq 2 \times 10^4$  cfu/ml, 1 if somatic cell count  $> 10^6$  cells/ml or total viable count  $> 2 \times 10^4$  cfu/ml, respectively, or 2 if somatic cell count  $> 10^6$  cells/ml and total viable count  $> 2 \times 10^4$  cfu/ml; UHP3= scored as 0 if somatic cell count  $\leq 10^6$  cells/ml and total viable count  $\leq 2 \times 10^4$  cfu/ml, 1 if only total viable count  $> 2 \times 10^4$  cfu/ml, 2 if only somatic cell count  $\leq 10^6$  cells/ml or 3 if somatic cell count  $> 10^6$  cells/ml and total viable count  $> 2 \times 10^4$  cfu/ml; GIN=gastrointestinal nematodes; FEC=faecal egg counts; FLC=faecal larval counts; NE=not estimable

\*Indicates statistically significant correlation estimates ( $P < 0.05$ ).

**Table S3.** Animal correlations (standard error in parentheses) of health and welfare traits with performance traits in Skopelos goats.

| Health and welfare traits      | Performance traits    |                      |                          |                          |                      |              |
|--------------------------------|-----------------------|----------------------|--------------------------|--------------------------|----------------------|--------------|
|                                | Milk yield<br>(g, ln) | Fat yield<br>(g, ln) | Protein yield<br>(g, ln) | Lactose yield<br>(g, ln) | SNF yield<br>(g, ln) | BCS<br>(1-5) |
| SCC ( $\times 10^3$ cells/ml)  | -0.22 (0.06)*         | -0.29 (0.06)*        | -0.18 (0.06)*            | -0.27 (0.06)*            | -0.23 (0.06)*        | 0.09 (0.06)  |
| TVC ( $\times 10^3$ cfu/ml)    | -0.23 (0.06)*         | -0.30 (0.07)*        | -0.18 (0.06)*            | -0.28 (0.06)*            | -0.24 (0.06)*        | 0.06 (0.07)  |
| SMI                            | -0.24 (0.07)*         | -0.33 (0.07)*        | -0.20 (0.07)*            | -0.29 (0.07)*            | -0.25 (0.07)*        | 0.04 (0.07)  |
| UHP1 (0-1)                     | -0.30 (0.07)*         | -0.39 (0.07)*        | -0.24 (0.07)*            | -0.35 (0.07)*            | -0.31 (0.07)*        | 0.06 (0.08)  |
| UHP2 (0-2)                     | -0.31 (0.09)*         | -0.39 (0.09)*        | -0.22 (0.09)*            | -0.37 (0.09)*            | -0.31 (0.09)*        | 0.03 (0.09)  |
| UHP3 (0-3)                     | -0.22 (0.07)*         | -0.30 (0.07)*        | -0.15 (0.07)*            | -0.28 (0.07)*            | -0.22 (0.07)*        | 0.08 (0.07)  |
| GIN FEC (eggs/g, Tukey)        | -0.36 (0.48)          | -0.22 (0.58)         | 0.12 (0.48)              | -0.14 (0.57)             | -0.38 (0.45)         | 0.04 (0.58)  |
| Cestode FEC (eggs/g, Tukey)    | 0.21 (0.28)           | 0.16 (0.33)          | 0.37 (0.28)              | NE                       | NE                   | NE           |
| Lungworm FLC (larvae/g, Tukey) | 0.26 (0.42)           | 0.11 (0.46)          | 0.06 (0.67)              | 0.08 (0.50)              | 0.08 (0.58)          | 0.04 (0.48)  |
| GIN infection (0-1)            | -0.03 (0.35)          | -0.21 (0.34)         | -0.06 (0.35)             | -0.04 (0.35)             | -0.05 (0.34)         | -0.43 (0.23) |
| Cestode infection (0-1)        | 0.20 (0.24)           | 0.09 (0.24)          | 0.24 (0.23)              | 0.18 (0.24)              | 0.21 (0.24)          | 0.23 (0.23)  |
| Lungworm infection (0-1)       | -0.11 (0.45)          | -0.12 (0.44)         | -0.09 (0.44)             | -0.10 (0.45)             | -0.10 (0.46)         | 0.13 (0.44)  |
| Endoparasite infection (0-1)   | 0.13 (0.36)           | -0.08 (0.36)         | 0.15 (0.36)              | 0.14 (0.36)              | 0.12 (0.36)          | -0.23 (0.35) |
| Tick infestation (0-1)         | 0.01 (0.24)           | 0.04 (0.24)          | -0.05 (0.25)             | -0.00 (0.25)             | -0.02 (0.30)         | 0.04 (0.25)  |
| Myiasis (0-1)                  | -0.22 (0.14)          | -0.17 (0.14)         | -0.22 (0.15)             | -0.23 (0.14)             | -0.28 (0.18)         | 0.33 (0.18)  |
| Ear injuries (0-1)             | 0.07 (0.11)           | 0.06 (0.12)          | 0.07 (0.12)              | 0.07 (0.11)              | 0.07 (0.11)          | -0.03 (0.12) |
| Horn injuries (0-1)            | 0.12 (0.08)           | 0.10 (0.09)          | 0.10 (0.09)              | 0.10 (0.09)              | -0.03 (0.09)         | 0.01 (0.10)  |
| Head skin lesions (0-1)        | -0.10 (0.14)          | 0.04 (0.15)          | -0.13 (0.14)             | -0.07 (0.15)             | -0.12 (0.26)         | -0.10 (0.15) |
| Nasal discharge (0-1)          | NE                    | NE                   | NE                       | NE                       | NE                   | NE           |
| Ocular discharge (0-1)         | NE                    | NE                   | NE                       | NE                       | NE                   | NE           |
| Head problems (0-1)            | 0.10 (0.07)           | 0.11 (0.07)          | 0.08 (0.07)              | 0.08 (0.07)              | 0.08 (0.07)          | -0.02 (0.07) |
| Abscess (0-1)                  | 0.12 (0.08)           | 0.16 (0.08)          | 0.13 (0.08)              | 0.13 (0.08)              | 0.13 (0.08)          | -0.05 (0.08) |
| Diarrhoea (0-1)                | NE                    | NE                   | NE                       | NE                       | NE                   | NE           |

|                          |              |              |              |              |              |              |
|--------------------------|--------------|--------------|--------------|--------------|--------------|--------------|
| Injury (0-1)             | NE           | NE           | NE           | NE           | NE           | NE           |
| Hernia (0-1)             | NE           | NE           | NE           | NE           | NE           | NE           |
| Body problems (0-1)      | 0.11 (0.07)  | 0.14 (0.08)  | 0.10 (0.08)  | 0.10 (0.08)  | 0.10 (0.08)  | -0.04 (0.08) |
| Lameness (0-1)           | NE           | NE           | NE           | NE           | NE           | NE           |
| Overgrown claws (0-1)    | 0.36 (0.10)* | 0.44 (0.10)* | 0.38 (0.10)* | 0.37 (0.09)* | 0.40 (0.10)* | -0.12 (0.10) |
| Arthritis (0-1)          | NE           | NE           | NE           | NE           | NE           | NE           |
| Leg problems (0-1)       | 0.34 (0.09)* | 0.45 (0.10)* | 0.37 (0.10)* | 0.36 (0.10)* | 0.39 (0.10)  | -0.15 (0.10) |
| Udder asymmetry (0-1)    | -0.08 (0.07) | -0.12 (0.07) | -0.04 (0.07) | -0.09 (0.07) | -0.08 (0.07) | 0.13 (0.07)  |
| Udder abscess (0-1)      | 0.23 (0.06)* | 0.10 (0.07)  | 0.24 (0.07)* | 0.18 (0.07)* | 0.21 (0.07)* | 0.09 (0.07)  |
| Udder skin lesions (0-1) | 0.21 (0.12)  | 0.16 (0.12)  | 0.19 (0.13)  | 0.20 (0.12)  | 0.51 (0.26)  | 0.08 (0.12)  |
| Udder problems (0-1)     | 0.13 (0.07)  | 0.01 (0.07)  | 0.15 (0.07)* | 0.08 (0.07)  | 0.11 (0.07)  | 0.17 (0.09)  |
| Skin lesions (0-1)       | 0.12 (0.13)  | 0.15 (0.14)  | 0.06 (0.14)  | 0.13 (0.13)  | 0.10 (0.13)  | 0.01 (0.14)  |
| Injuries (0-1)           | 0.15 (0.08)  | 0.10 (0.08)  | 0.13 (0.08)  | 0.13 (0.08)  | 0.14 (0.07)  | 0.02 (0.08)  |

SNF=solids-non-fat; BCS=body condition score (1=emaciated, 5=obese); SCC=somatic cell count; TVC=total viable count; SMI=subclinical mastitis index; UHP1= scored as 0 if somatic cell count  $\leq 10^6$  cells/ml and/or total viable count  $\leq 2 \times 10^4$  cfu/ml, or 1 if somatic cell count  $> 10^6$  cells/ml and total viable count  $> 20 \times 10^3$  cfu/ml; UHP2= scored as 0 if somatic cell count  $\leq 10^6$  cells/ml and total viable count  $\leq 2 \times 10^4$  cfu/ml, 1 if somatic cell count  $> 10^6$  cells/ml or total viable count  $> 2 \times 10^4$  cfu/ml, respectively, or 2 if somatic cell count  $> 10^6$  cells/ml and total viable count  $> 2 \times 10^4$  cfu/ml; UHP3= scored as 0 if somatic cell count  $\leq 10^6$  cells/ml and total viable count  $\leq 2 \times 10^4$  cfu/ml, 1 if only total viable count  $> 2 \times 10^4$  cfu/ml, 2 if only somatic cell count  $\leq 10^6$  cells/ml or 3 if somatic cell count  $> 10^6$  cells/ml and total viable count  $> 2 \times 10^4$  cfu/ml; GIN=gastrointestinal nematodes; FEC=faecal egg counts; FLC=faecal larval counts; NE=not estimable.

\*Indicates statistically significant correlation estimates ( $P < 0.05$ ).

**Table S4.** Animal correlations (standard error in parentheses) of health and welfare traits with performance traits in Damascus goats.

| Health and welfare traits      | Performance traits    |                      |                          |                          |                      |              |
|--------------------------------|-----------------------|----------------------|--------------------------|--------------------------|----------------------|--------------|
|                                | Milk yield<br>(g, ln) | Fat yield<br>(g, ln) | Protein yield<br>(g, ln) | Lactose yield<br>(g, ln) | SNF yield<br>(g, ln) | BCS<br>(1-5) |
| SCC ( $\times 10^3$ cells/ml)  | -0.25 (0.09)*         | -0.24 (0.09)*        | -0.08 (0.09)             | -0.27 (0.09)*            | -0.20 (0.09)*        | -0.01 (0.07) |
| TVC ( $\times 10^3$ cfu/ml)    | -0.01 (0.10)          | -0.04 (0.10)         | 0.11 (0.10)              | -0.08 (0.10)             | 0.01 (0.10)          | 0.01 (0.09)  |
| SMI                            | -0.16 (0.12)          | -0.10 (0.12)         | -0.02 (0.12)             | -0.20 (0.12)             | -0.12 (0.12)         | 0.08 (0.10)  |
| UHP1 (0-1)                     | -0.25 (0.09)*         | -0.21 (0.10)*        | -0.04 (0.10)             | -0.33 (0.10)*            | -0.20 (0.10)         | 0.06 (0.09)  |
| UHP2 (0-2)                     | -0.23 (0.09)*         | -0.34 (0.09)*        | -0.09 (0.09)             | -0.33 (0.09)*            | -0.22 (0.09)*        | 0.11 (0.08)  |
| UHP3 (0-3)                     | -0.20 (0.08)*         | -0.30 (0.08)*        | -0.09 (0.08)             | 0.27 (0.08)*             | 0.19 (0.08)*         | 0.09 (0.07)  |
| GIN FEC (eggs/g, Tukey)        | 0.10 (0.56)           | 0.16 (0.56)          | 0.08 (0.56)              | 0.07 (0.56)              | 0.08 (0.57)          | -0.07 (0.58) |
| Cestode FEC (eggs/g, Tukey)    | NE                    | NE                   | NE                       | NE                       | NE                   | NE           |
| Lungworm FLC (larvae/g, Tukey) | NE                    | NE                   | NE                       | NE                       | NE                   | NE           |
| GIN infection (0-1)            | 0.04 (0.57)           | 0.08 (0.58)          | -0.01 (0.56)             | -0.06 (0.56)             | -0.02 (0.57)         | 0.04 (0.56)  |
| Cestode infection (0-1)        | NE                    | NE                   | NE                       | NE                       | NE                   | NE           |
| Lungworm infection (0-1)       | NE                    | NE                   | NE                       | NE                       | NE                   | NE           |
| Endoparasite infection (0-1)   | 0.13 (0.55)           | 0.17 (0.57)          | 0.03 (0.57)              | 0.06 (0.57)              | 0.05 (0.57)          | -0.02 (0.57) |
| Tick infestation (0-1)         | NE                    | NE                   | NE                       | NE                       | NE                   | NE           |
| Myiasis (0-1)                  | NE                    | NE                   | NE                       | NE                       | NE                   | NE           |
| Ear injuries (0-1)             | 0.02 (0.12)           | 0.00 (0.13)          | 0.08 (0.12)              | 0.05 (0.13)              | 0.04 (0.12)          | 0.25 (0.13)  |
| Horn injuries (0-1)            | -0.05 (0.10)          | -0.10 (0.10)         | -0.09 (0.10)             | -0.08 (0.10)             | -0.07 (0.10)         | -0.07 (0.08) |
| Head skin lesions (0-1)        | 0.15 (0.12)           |                      | 0.19 (0.11)              | 0.16 (0.12)              | 0.17 (0.11)          | 0.01 (0.11)  |
| Nasal discharge (0-1)          | 0.04 (0.17)           | 0.07 (0.18)          | 0.13 (0.17)              | 0.03 (0.17)              | 0.08 (0.18)          | 0.11 (0.15)  |
| Ocular discharge (0-1)         | NE                    | NE                   | NE                       | NE                       | NE                   | NE           |
| Head problems (0-1)            | 0.02 (0.08)           | 0.02 (0.09)          | 0.04 (0.08)              | 0.02 (0.08)              | 0.03 (0.08)          | 0.05 (0.07)  |
| Abscess (0-1)                  | 0.08 (0.10)           | 0.12 (0.11)          | 0.13 (0.10)              | 0.13 (0.10)              | 0.11 (0.10)          | -0.02 (0.08) |

|                          |               |               |               |               |               |               |
|--------------------------|---------------|---------------|---------------|---------------|---------------|---------------|
| Diarrhoea (0-1)          | NE            | NE            | NE            | NE            | NE            | NE            |
| Injury (0-1)             | NE            | NE            | NE            | NE            | NE            | NE            |
| Hernia (0-1)             | NE            | NE            | NE            | NE            | NE            | NE            |
| Body problems (0-1)      | 0.04 (0.10)   | 0.05 (0.11)   | 0.07 (0.10)   | 0.10 (0.11)   | 0.07 (0.10)   | -0.02 (0.09)  |
| Lameness (0-1)           | 0.12 (0.15)   | 0.19 (0.15)   | 0.20 (0.14)   | 0.15 (0.15)   | 0.17 (0.15)   | -0.19 (0.11)  |
| Overgrown claws (0-1)    | -0.05 (0.12)  | -0.20 (0.12)  | -0.07 (0.13)  | -0.06 (0.12)  | -0.05 (0.12)  | -0.17 (0.10)  |
| Arthritis (0-1)          | -0.05 (0.13)  | -0.02 (0.12)  | 0.00 (0.12)   | -0.05 (0.13)  | -0.03 (0.12)  | -0.22 (0.09)* |
| Leg problems (0-1)       | -0.04 (0.12)  | -0.16 (0.13)  | -0.04 (0.12)  | -0.04 (0.12)  | 0.01 (0.11)   | -0.28 (0.10)* |
| Udder asymmetry (0-1)    | -0.24 (0.08)* | -0.24 (0.08)* | -0.20 (0.08)* | -0.23 (0.08)* | -0.23 (0.08)* | 0.01 (0.07)   |
| Udder abscess (0-1)      | 0.10 (0.09)   | -0.11 (0.09)  | 0.13 (0.09)   | 0.08 (0.09)   | 0.09 (0.09)   | 0.02 (0.08)   |
| Udder skin lesions (0-1) | 0.16 (0.16)   | 0.30 (0.15)   | 0.10 (0.17)   | 0.25 (0.17)   | 0.19 (0.16)   | -0.02 (0.15)  |
| Udder problems (0-1)     | -0.11 (0.08)  | -0.11 (0.08)  | -0.07 (0.08)  | -0.11 (0.08)  | -0.10 (0.09)  | -0.00 (0.07)  |
| Skin lesions (0-1)       | 0.19 (0.11)   | 0.20 (0.11)   | 0.22 (0.11)   | 0.22 (0.12)   | 0.21 (0.12)   | 0.00 (0.10)   |
| Injuries (0-1)           | 0.01 (0.09)   | -0.04 (0.09)  | 0.00 (0.09)   | 0.01 (0.09)   | 0.01 (0.09)   | -0.00 (0.07)  |

SNF=solids-non-fat; BCS=body condition score (1=emaciated, 5=obese); SCC=somatic cell count; TVC=total viable count; SMI=subclinical mastitis index; UHP1= scored as 0 if somatic cell count  $\leq 10^6$  cells/ml and/or total viable count  $\leq 2 \times 10^4$  cfu/ml, or 1 if somatic cell count  $> 10^6$  cells/ml and total viable count  $> 20 \times 10^3$  cfu/ml; UHP2= scored as 0 if somatic cell count  $\leq 10^6$  cells/ml and total viable count  $\leq 2 \times 10^4$  cfu/ml, 1 if somatic cell count  $> 10^6$  cells/ml or total viable count  $> 2 \times 10^4$  cfu/ml, respectively, or 2 if somatic cell count  $> 10^6$  cells/ml and total viable count  $> 2 \times 10^4$  cfu/ml; UHP3= scored as 0 if somatic cell count  $\leq 10^6$  cells/ml and total viable count  $\leq 2 \times 10^4$  cfu/ml, 1 if only total viable count  $> 2 \times 10^4$  cfu/ml, 2 if only somatic cell count  $\leq 10^6$  cells/ml or 3 if somatic cell count  $> 10^6$  cells/ml and total viable count  $> 2 \times 10^4$  cfu/ml; GIN=gastrointestinal nematodes; FEC=faecal egg counts; FLC=faecal larval counts; NE=not estimable.

\*Indicates statistically significant correlation estimates ( $P < 0.05$ ).
